# Supplementary material for: Inhibition of In Vitro Infection of Hepatitis B Virus by Human Breastmilk
Source: MDPI journal article supplement (doi:10.3390/nu14081561), 2022-04-08
Supplement: s1 [file s1]

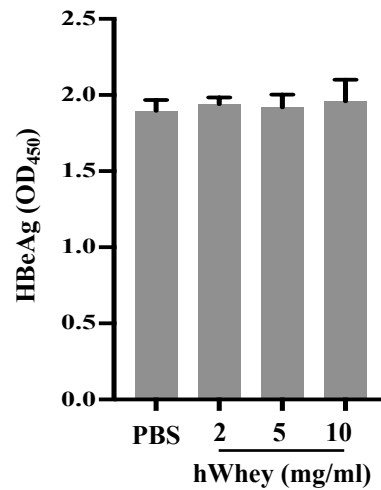

**Supplementary Figure S1:** Human whey does not bind to anti-HBs. Anti-HBs coated microplate wells were incubated with PBS (controls) or human whey (hWhey) at room temperature for 30 minutes. After wash, the plate was used to detect recombinant HBsAg using ELISA. Data are presented as means  $\pm$  SD.

**A**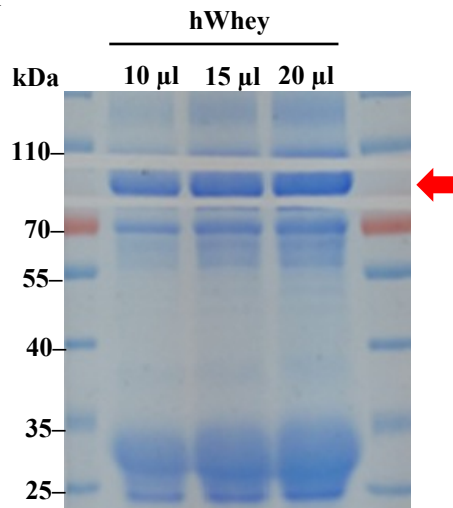**B**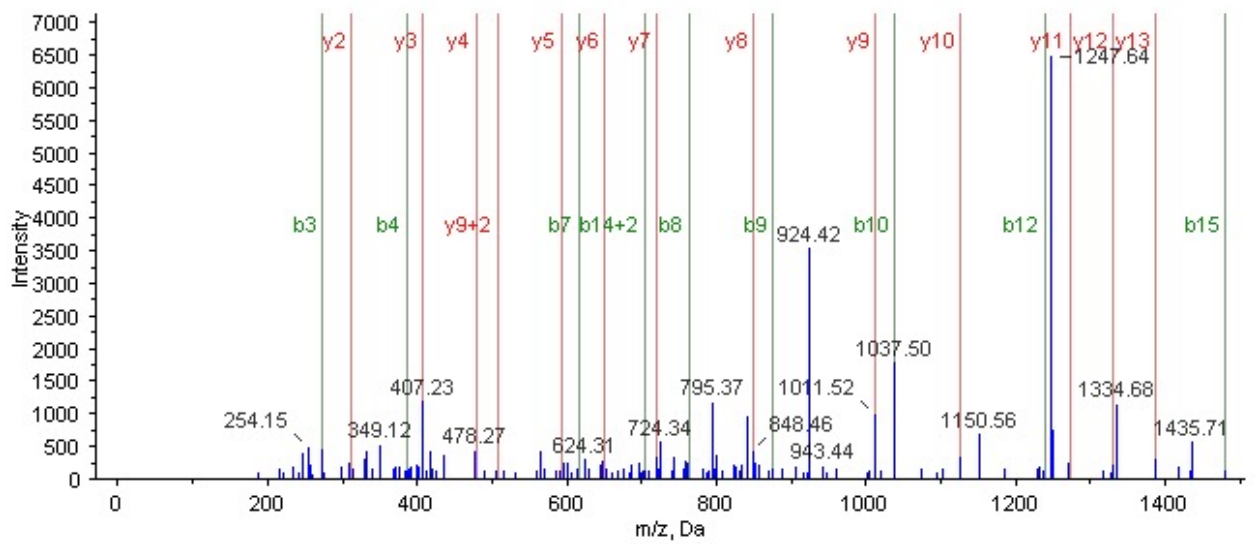

C

| Con... | Conf | Sequence                 | Modifications                                              | Cleavages      | ΔMass   | Prec MW    | z | Sc | Spectrum      | Type   |
|--------|------|--------------------------|------------------------------------------------------------|----------------|---------|------------|---|----|---------------|--------|
| 2.00   | 99   | ADAVTLDGGFIYEAGLAPYK     | Dehydrated(D)@7                                            |                | -0.0027 | 2052.01... | 2 | 19 | 1.1.1.1277.26 | Winner |
| 2.00   | 99   | ADFALLCLDGK              | Carbamidomethyl(C)@7                                       | cleaved L-...  | -0.0011 | 1221.60... | 2 | 19 | 1.1.1.1244.11 | Winner |
| 2.00   | 99   | AFSSQEPYFSYSGAFK         |                                                            | cleaved C-...  | -0.0033 | 1814.81... | 2 | 21 | 1.1.1.1213.24 | Winner |
| 2.00   | 99   | AVTLDGGFIYEAGLAPYK       |                                                            | cleaved D-...  | -0.0018 | 1883.96... | 2 | 19 | 1.1.1.1277.25 | Winner |
| 2.00   | 99   | CAFSSQEPYF               | Carbamidomethyl(C)@1                                       | cleaved F-...  | -0.0047 | 1234.49... | 2 | 14 | 1.1.1.1226.9  | Winner |
| 2.00   | 99   | CAFSSQEPYFSYSGA          | Carbamidomethyl(C)@1                                       | cleaved A-...  | -0.0068 | 1699.67... | 2 | 18 | 1.1.1.1226.27 | Winner |
| 2.00   | 99   | CAFSSQEPYFSYSGAFK        | Carbamidomethyl(C)@1<br>Dehydrated(S)@5<br>Deamidated(Q)@6 |                | 0.0031  | 1957.82... | 2 | 23 | 1.1.1.1282.26 | Winner |
| 2.00   | 99   | CAFSSQEPYFSYSGAFKCLR     | Carbamidomethyl(C)@1<br>Carbamidomethyl(C)@18              | missed K-C...  | 0.0062  | 2404.06... | 3 | 14 | 1.1.1.1221.23 | Winner |
| 2.00   | 99   | CGLVPVLAENY              | Carbamidomethyl(C)@1                                       | cleaved Y-K... | -0.0054 | 1233.60... | 2 | 18 | 1.1.1.1273.4  | Winner |
| 2.00   | 99   | CGLVPVLAENYK             | Carbamidomethyl(C)@1                                       |                | 0.0054  | 1361.70... | 2 | 20 | 1.1.1.1183.11 | Winner |
| 2.00   | 99   | CLAENAGDVAFVK            | Carbamidomethyl(C)@1                                       |                | -0.0014 | 1392.66... | 2 | 21 | 1.1.1.1149.20 | Winner |
| 2.00   | 99   | CLAENAGDVAFVKDVTVLQNT... | Carbamidomethyl(C)@1<br>Carbamidomethyl(Q)@13              | missed K-D...  | 0.0269  | 3419.63... | 3 | 20 | 1.1.1.1241.31 | Winner |
| 2.00   | 99   | CLRDGAGDVAFIR            | Carbamidomethyl(C)@1<br>Deamidated(R)@3<br>Dehydrated(D)@4 | missed R-D...  | -0.0031 | 1431.68... | 2 | 20 | 1.1.1.1223.14 | Winner |

D

MKLVFLVLLFLGALGLCLAGRRRSVQWCAVSQPEATKCFQWQRNMRKVRGPPVSCIKRDSPIQCIQATAENRADAVTLDGGFIYEA  
GLAPYKLRPVAAEFVYTERQPRTHYYAVAVVKKGGSFQLNELQGLKSCHTGLRRTAGWNVPIGTLRPFLNWTGPPEPIEAARFF  
SASCVPGADKGQFPNL CRLCAGTGENKCAFSSQEPYFSYSGAFKCLR DGADVAFIRESTVFEDLSDEAERDEYELLCPDNTRKPV  
DKF**KDCHLAR**VP SHAVVARSVNGKEDAIWNLLR**QAQEKFGK**DKSPKFQLFGSPSGQKDLLFKD SAIGFSRVPPRIDSGLYLGSYF  
TAIQNLRKSEEEVAAR**RARVVW**CAVGEQELRKCNQWSGLSEGSVTCSSASTTEDCIAVLKGEADAMSLDGGYVYTAGKCGLVPVL  
AENYKSSQSSDPDPNCVDRPVEGYLAVAVVRRSDTSLTWNVSKGKKSCHTAVDRTAGWNIPMGLLNFQGTGSC**KFDEYFSQSCAPGS**  
DPRSNLCALCIGDEQGENKCVPNSENERYGYTGAFRCLAENAGDVAFVKDVTVLQNTDGNNNEAWAKDLKLADFALLCLDGKRPV  
TEARSCHLAMAPNHAVVSR**MDKVER**LKQVLLHQQAKFGRNGSDCPDKFCLFQSETKNLLFNDNTECLAR**LHGKT**TYEKYLGPGYVA  
GITNLKKCSTSPLEACEFLRK

**Supplementary Figure S2:** Identification of human lactoferrin as HBsAg-binding protein in human whey by mass spectrometry analysis. (A) Human whey proteins were separated in SDS-PAGE, and the gel was cut at 80 kD (indicated by the red arrow) for mass spectrometry analysis. (B) The obtained mass-to-charge ratio (m/z) mass spectrum. (C) The total number of identified peptide sequences (peptide spectrum matches, PSMs) for human lactoferrin. (D) The identified peptide sequences were with 93.4% amino acid residues identical with the human lactoferrin. Green: identified PSMs.

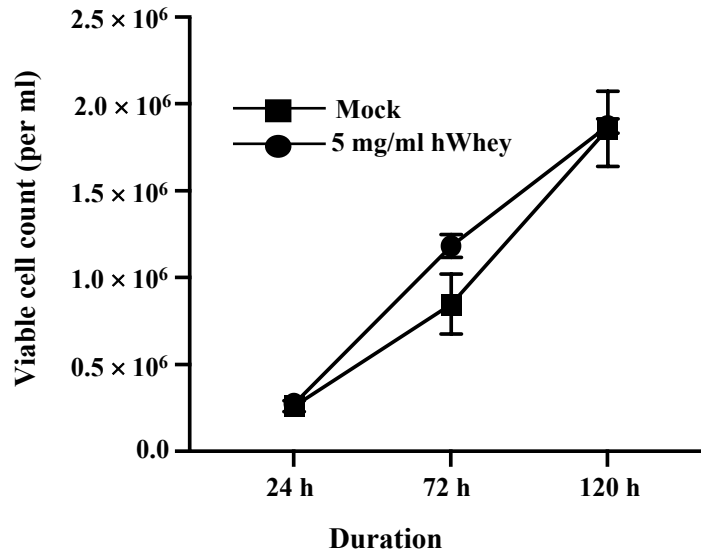

**Supplementary Figure S3:** Human whey at 5 mg/ml does not show any cytotoxic effect on HepG2-NTCP cells. HepG2-NTCP cells were incubated with 5 mg/ml human whey (hWhey) or PBS for 24 hours. The culture medium was replaced with fresh medium after the incubation, and the cells were kept for up to 120 hours. Cell numbers were counted at the indicated time point after incubation. Data are presented as means  $\pm$  SD.
